# Supplementary material
Source: publisher figshare collection journal article supplement (https://karger.figshare.com/ndownloader/files/13170035)
Supplement: Supplementary file 1 [file 13170035]

| **Supplemental Table B: Extubation to CPAP verses NIPPV across Cohort** | | | |
| --- | --- | --- | --- |
|  | **CPAP** | **NIPPV** | p value |
|  | *n*=247 | *n=*107 |  |
| Gestational Age (weeks) | 27.1 ± 2.0 | 26 2/7 ± 2.3 | p <0.01 |
| Birth Weight (g) | 895 ± 204 | 797 ±184 | p <0.01 |
| Male (%) | 137 (56%) | 57 (53%) | NS |
| DOL at Extubation | 8.9 ± 15.5 | 11.8 ± 15.7 | NS |
| Caucasian | 110 (45%) | 39 (36%) | NS |
| Postnatal Dexamethasone | 125 (51%) | 61 (57%) | NS |
| Extubation Failure | 87 (35%) | 29 (27%) | NS |
| **Infants less than 750 grams** | | | |
|  | *n*=72 | *n*=50 |  |
| Birth weight (g) | 647 ± 70 | 640 ± 69 | NS |
| Extubation Failure | 30 (42%) | 18 (36%) | NS |
| Bronchopulmonary dysplasia | 59 (82%) | 41 (82%) | NS |
| **Infants 750 to 1250 grams** | | | |
|  | *n*=175 | *n*=57 |  |
| Birth weight (g) | 997 ± 144 | 934 ± 139 | p <0.01 |
| Extubation Failure | 55 (31%) | 11 (19%) | NS |
| Bronchopulmonary dysplasia | 107 (61%) | 33 (58%) | NS |
| Mean ± Standard Deviation | | | |
